# Supplementary material for: Heterologous prion-forming proteins interact to cross-seed aggregation in Saccharomyces cerevisiae
Source: PubMed Central journal article supplement (PMC5517628; doi:10.1038/s41598-017-05829-5), 2017-07-19
Supplement: 41598_2017_5829_MOESM1_ESM.pdf [file 41598_2017_5829_MOESM1_ESM.pdf]

Heterologous prion-forming proteins interact to cross-seed aggregation in *Saccharomyces cerevisiae*

Kathryn M. Keefer,<sup>1</sup> Kevin C. Stein,<sup>2</sup> and Heather L. True<sup>1\*</sup>

**Supplementary Information**

**Table S1. Strains used in this study.**

| Strain | Description                                                                                                             | Reference  |
|--------|-------------------------------------------------------------------------------------------------------------------------|------------|
| 2261   | 74D-694; [psi-], high [RNQ+], MATa, <i>ade1-14 his3Δ-200 trp1-289 ura3-52 leu2-3,112, sup35Δ::HygBMX4, RNQ1</i>         | 30         |
| 2160   | 74D-694; [psi-], high [RNQ+], MATa, <i>ade1-14 his3Δ-200 trp1-289 ura3-52 leu2-3,112, sup35Δ::HygBMX4, RNQ1-Q298R</i>   | This study |
| 1890   | 74D-694; [psi-], [rnq-], MATA, <i>ade1-14 his3Δ-200 trp1-289 ura3-52 leu2-3,112, sup35Δ::HygBMX4, RNQ1</i>              | 30         |
| 1951   | 74D-694; [psi-], [rnq-], MATA, <i>ade1-14 his3Δ-200 trp1-289 ura3-52 leu2-3,112, sup35Δ::HygBMX4, RNQ1-Q298R</i>        | This study |
| 2040   | 74D-694; [psi-], [rnq-], MATa, <i>ade1-14 his3Δ-200 trp1-289 ura3-52 leu2-3,112, sup35Δ::HygBMX4, kar1-Δ15, ρ0</i>      | This study |
| 2047   | 74D-694; [psi-], high [RRP+], MATA, <i>ade1-14 his3Δ-200 trp1-289 ura3-52 leu2-3,112, sup35Δ::RMC, rnq1Δ::KANMX4</i>    | 30         |
| 1282   | 74D-694; [psi-], high [RNQ+], MATA, <i>ade1-14 his3Δ-200 trp1-289 ura3-52 leu2-3,112, sup35Δ::KANMX4, rnq1Δ::KANMX4</i> | This study |

**Table S2. Plasmids used in this study.**

| Plasmid | Description                 | Use                                                 | Reference  |
|---------|-----------------------------|-----------------------------------------------------|------------|
| 5049    | pYK810                      | Cover <i>SUP35</i> deletion with <i>SUP35</i>       | 50         |
| 5281    | p416TEF-SP5                 | Template for screen                                 | This study |
| 5787    | p415TEF-SP5                 | Backbone for screen candidate expression            | This study |
| 6244    | pEMBL- <i>SUP35</i>         | [PSI+] induction – WT                               | 30         |
| 6257    | pRS315- <i>sup35-N5Y</i>    | Cover <i>SUP35</i> deletion with <i>sup35-N5Y</i>   | This study |
| 6342    | pEMBL- <i>sup35-N5Y</i>     | [PSI+] induction – N5Y                              | This study |
| 6473    | pRS315- <i>sup35-Q6R</i>    | Cover <i>SUP35</i> deletion with <i>sup35-Q6R</i>   | This study |
| 6483    | pEMBL- <i>sup35-Q6R</i>     | [PSI+] induction – Q6R                              | This study |
| 6474    | pRS315- <i>sup35-G116V</i>  | Cover <i>SUP35</i> deletion with <i>sup35-G116V</i> | This study |
| 6484    | pEMBL- <i>sup35-G116V</i>   | [PSI+] induction – G116V                            | This study |
| 5074    | pPROEX-Htb- <i>RNQ1</i>     | WT Rnq1 purification                                | This study |
| SL7111  | pAED4-SCNM- <i>his7</i>     | WT Sup35 bait for Rnq1-trap on resin                | 14         |
| 6771    | pAED4-SCNM- <i>G7C-his7</i> | Purification for crosslinking reagent               | This study |
| 6772    | pAED4-SCTD- <i>his7</i>     | Control bait for Rnq1-trap on resin                 | This study |
| 5719    | pRS313- <i>rnq1-Q298R</i>   | Mitotic stability testing of Rnq1-Q298R             | This study |
| 6312    | pRS313- <i>RNQ1</i>         | Mitotic stability testing of WT Rnq1                | 30         |

**Table S3. Antibodies used in this study.**

| <b>Antigen</b> | <b>Production notes</b> | <b>Type</b>       | <b>Dilution</b> | <b>Source</b> |
|----------------|-------------------------|-------------------|-----------------|---------------|
| Sup35          | Peptide, a.a.s 137-151  | Rabbit polyclonal | 1:1,500         | Lindquist lab |
| Rnq1           | Full-length Rnq1        | Rabbit polyclonal | 1:1,000         | True lab      |
| Rnq1           | Full-length Rnq1        | Rat polyclonal    | 1:2,000         | True lab      |
| Rabbit         | Rabbit IgG              | Goat polyclonal   | 1:10,000        | Sigma A0545   |
| Rat            | Rat IgG                 | Rabbit polyclonal | 1:10,000        | Sigma A5795   |

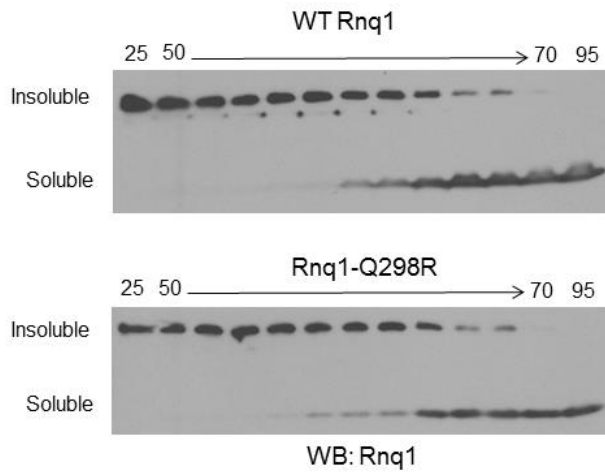

**Figure S1. Rnq1-Q298R aggregates have similar properties to WT Rnq1 aggregates**

Representative western blots from thermal stability experiments quantified in Figure 3B. Cell lysates were subjected to a temperature gradient before SDS-PAGE and western blotting. Insoluble material, such as prion aggregates, requires treatment at high temperatures in order to enter the resolving gel. There were no observable differences between WT and Rnq1-Q298R aggregates.

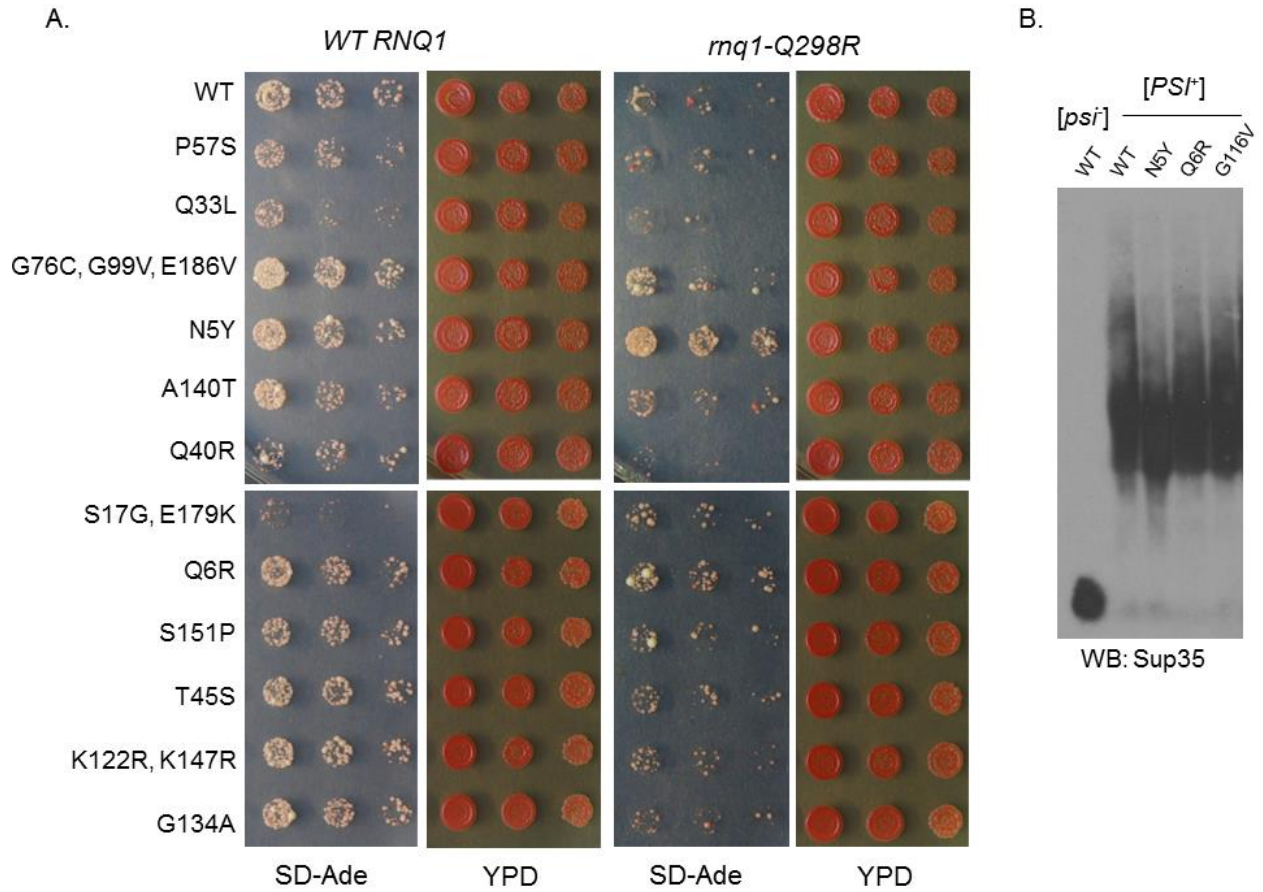

**Figure S2. Mutants isolated from *SP5* suppressor screen**

(A) Full spottings of screen candidates from Figure 4A. (B) SDD-AGE analysis demonstrates that the rescuing mutants Sup35-N5Y, Sup35-Q6R, and Sup35-G116V can all propagate [*PSI*<sup>+</sup>].

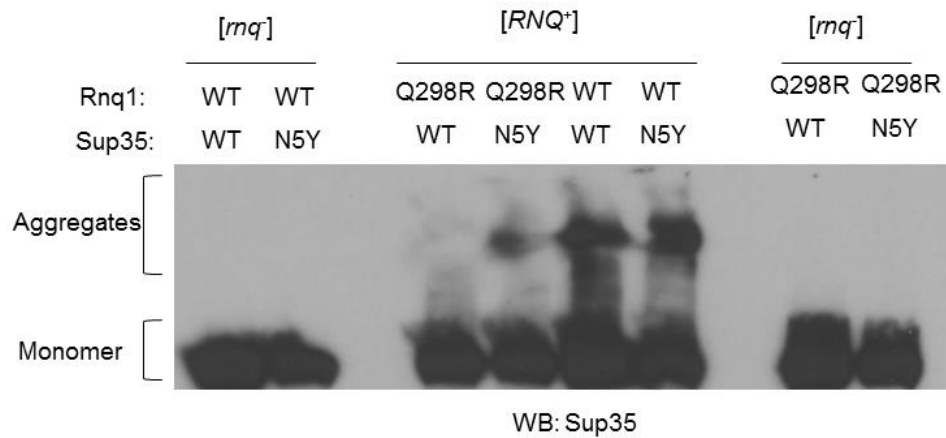

**Figure S3. Boiled gel assay with additional [*rnq*<sup>-</sup>] controls**

As in Figure 5B, the indicated yeast strains we subjected to a boiled gel protocol to assess the aggregated vs monomeric Sup35. No aggregated Sup35 was detectable in any of the [*rnq*<sup>-</sup>] strains, regardless of genetic background.

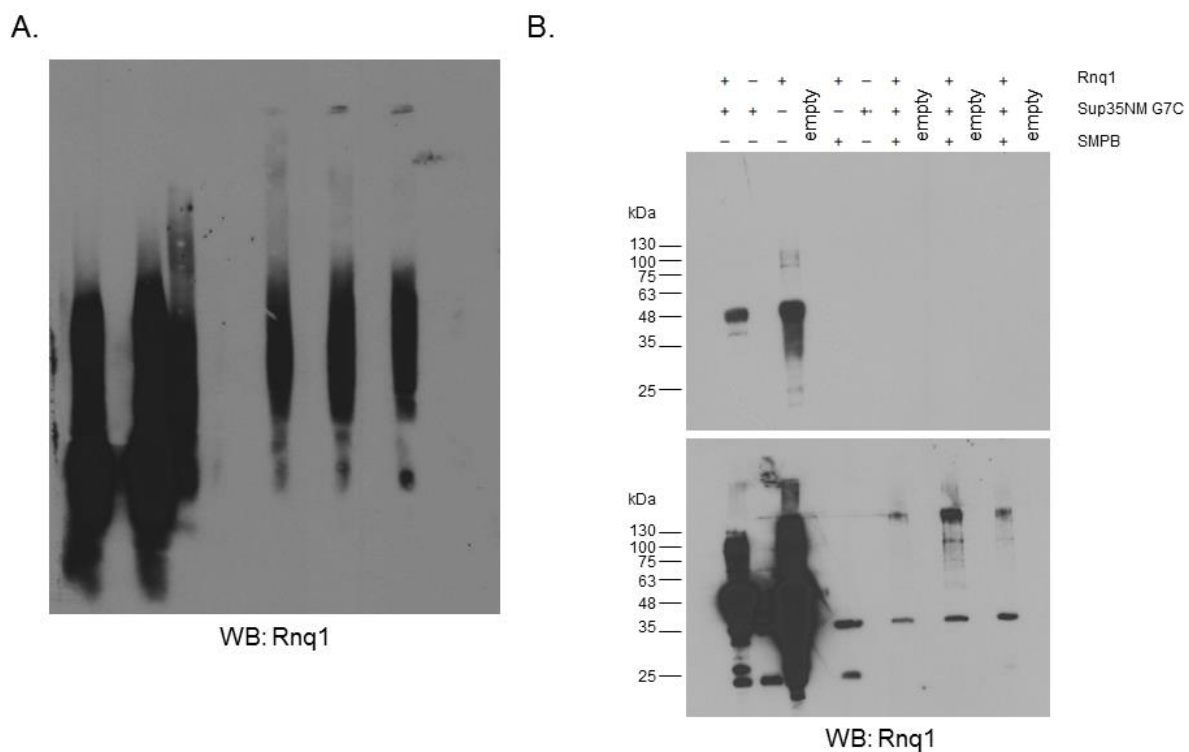

**Figure S4. Full crosslinking blots**

(A) SDD-AGE from Figure 6, probed with rat anti-Rnq1 primary and rabbit anti-rat secondary antibodies. (B) Complete SDS-PAGE blot from Figure 6. Two exposures are shown to allow for clear viewing of the recombinant Rnq1 in lanes 1 and 3.
